# Supplementary material for: Discovery and structural characterisation of new fold type IV-transaminases exemplify the diversity of this enzyme fold
Source: PubMed Central journal article supplement (PMC5131300; doi:10.1038/srep38183), 2016-12-01
Supplement: srep38183-s1.pdf [file srep38183-s1.pdf]

## Supplementary material

### Discovery and structural characterisation of new fold type IV-transaminases exemplify the diversity of this enzyme fold

Tea Pavkov-Keller<sup>1</sup>, Gernot A. Strohmeier<sup>1</sup>, Matthias Diepold<sup>1</sup>, Wilco Peeters<sup>2</sup>, Natascha Smeets<sup>2</sup>, Martin Schürmann<sup>2</sup>, Karl Gruber<sup>1,3</sup>, Helmut Schwab<sup>1,4</sup>, Kerstin Steiner<sup>1</sup>

#### Supplemental tables

**Table S1.** Sequence identities (on protein level) of the newly identified proteins to the known (*R*)-ATAs from *Aspergillus terreus* (XP\_001209325, AT- $\omega$ TA) and *Arthrobacter* sp. KNK168 (ABN35871).

| <b>Protein</b> | <b>AT-<math>\omega</math>TA</b> | <b>ABN35871</b> | <b>aa</b> | <b>MW</b> | <b>pI</b> |
|----------------|---------------------------------|-----------------|-----------|-----------|-----------|
| <i>AspTA1</i>  | 26.9%                           | 25.7%           | 288       | 31.3      | 5.25      |
| <i>AspTA2</i>  | 18.6%                           | 21.3%           | 281       | 31.2      | 6.00      |
| <i>CpuTA1</i>  | 21.4%                           | 19.0%           | 305       | 32.7      | 4.66      |
| <i>CpuTA2</i>  | 15.7%                           | 14.2%           | 376       | 41.2      | 5.14      |
| <i>CpuTA3</i>  | 16.1%                           | 15.7%           | 264       | 28.5      | 5.71      |
| <i>MgiTA1</i>  | 17.0%                           | 18.5%           | 294       | 31.1      | 5.08      |
| <i>MgiTA2</i>  | 16.6%                           | 15.5%           | 372       | 40.4      | 5.05      |
| <i>RaqTA1</i>  | 24.9%                           | 25.2%           | 287       | 31.7      | 6.06      |
| <i>RaqTA2</i>  | 24.3%                           | 23.7%           | 309       | 34.1      | 5.8       |
| <i>RaqTA3</i>  | 18.9%                           | 21.2%           | 265       | 28.9      | 6.06      |

**Table S2.** Conserved amino acids of Fold class IV PLP-dependent enzymes according to Höhne et al., 2010. Marked in bold are amino acids found in the (*R*)-ATA subfamily. Marked in grey are the amino acids that do not fit the motif of the prediction.

| <b>Protein</b> | <b>31</b>   | <b>36</b> | <b>38</b>  | <b>40</b>         | <b>95ff</b>          | <b>105ff</b> | <b>prediction<sup>a</sup></b> |
|----------------|-------------|-----------|------------|-------------------|----------------------|--------------|-------------------------------|
| ADCL           | F/Y         | F         | T          | X                 | zxK                  | RGY          |                               |
| D-ATA          | F*          | Y         | V          | K(R/X)            | zYzQ                 | RxH*         |                               |
| BCAT           | Y           | F         | G          | R(K)              | YzR                  | zGz          |                               |
| <b>R-ATA</b>   | <b>H/R*</b> | <b>Y</b>  | <b>V/T</b> | <b>S(T/A/H/P)</b> | <b>(F(Y)VE(ANQ))</b> | -            |                               |
| ABN35871       | <b>H</b>    | <b>Y</b>  | <b>V</b>   | <b>H</b>          | <b>FVS</b>           |              | R-ATA                         |
| AT-ωTA         | <b>H</b>    | <b>Y</b>  | <b>V</b>   | <b>S</b>          | <b>FVE</b>           | RGT          | R-ATA                         |
| <i>Asp</i> TA1 | F           | <b>Y</b>  | <b>V</b>   | <b>P</b>          | VYLQ                 | RDH          | D-ATA                         |
| <i>Asp</i> TA2 | M           | F         | G          | R                 | YxK                  | G            | BCAT?                         |
| <i>Cpu</i> TA1 | <b>R</b>    | F         | <b>T</b>   | <b>A</b>          | LFAK                 | -            | ADCL?, R-ATA?                 |
| <i>Cpu</i> TA2 | Y           | F         | G          | K                 | YLR                  | G            | BCAT                          |
| <i>Mgi</i> TA1 | <b>R</b>    | F         | S          | G                 | LVIK                 | -            | ADCL?, R-ATA?                 |
| <i>Mgi</i> TA2 | Y           | F         | G          | K                 | YLR                  | G            | BCAT                          |
| <i>Raq</i> TA1 | F           | <b>Y</b>  | <b>V</b>   | <b>A</b>          | <b>VYLQ</b>          | RDF          | D-ATA                         |
| <i>Raq</i> TA2 | Y           | F         | G          | R                 | YIR                  | G            | BCAT                          |
| <i>Raq</i> TA3 | F           | F         | <b>T</b>   | R                 | K                    | RGQ          | ADCL                          |

<sup>a</sup>R-ATA: (*R*)-aminotransferase, D-ATA: D-amino acid aminotransferase, BCAT: branched chain aminotransferase, ADCL: 4-amino-4-deoxychorismate lyase

\*chainB

z represents one of the hydrophobic amino acids valine, leucine, isoleucine, methionine

**Table S3.** Sequences of primers used for cloning and mutagenesis in this study. Sequences of restriction sites are underlined, start and stop codons are indicated with boxes and mutated bases are highlighted in bold letters.

| Primer Name (mutation)  | Sequence                                      |
|-------------------------|-----------------------------------------------|
| AspTA1(Nde)_for         | TCACAT <u>ATG</u> ATTCCGGGCGTGCCG             |
| AspTA1(Hind)_rev        | TCAAAGCTT <u>TTA</u> CAGCGCGGCGATGCG          |
| AspTA2(Nde)_for         | TCACAT <u>ATG</u> GACGCCCTGTTTTGGCAC          |
| AspTA2(Hind)_rev        | TCAAAGCTT <u>TTA</u> CTTGCGGCCGGTGCTTTC       |
| CpuTA1(Nde)_for         | TCACAT <u>ATG</u> ACCCGTGCGACCCTCCTG          |
| CpuTA1(Hind)_rev        | TCAAAGCTT <u>TCA</u> GTCGGTGCGGGCGAG          |
| synCpuTA1(Nco)_for      | AATCACC <u>ATG</u> <b>g</b> CCCGTGCAACCCTGCTG |
| synCpuTA1(Xho-Stop)_rev | AATCACTCGAGATCGGTACGTGCCAGCAGATATGC           |
| CpuTA2(Nde)_for         | TCACAT <u>ATG</u> ACTTCTACCAGCATCTCCCTTACCAG  |
| CpuTA2(Hind)_rev        | TCAAAGCTT <u>CTA</u> CGCGTCGAGGCGCGTC         |
| CpuTA3(Nde)_for         | TCACATATGGACGCGAGCAGCACCCCTC                  |
| CpuTA3(Hind)_rev        | TCAAAGCTTTCAGGCTGCGAGCGGCAG                   |
| MgiTA1(Nde)_for         | TCACAT <u>ATG</u> ACCTGGCGTTTCGCGC            |
| MgiTA1(Hind)_rev        | TCAAAGCTT <u>TCA</u> GTCGCGCGGCGAGAG          |
| MgiTA2(Nde)_for         | TCACAT <u>ATG</u> ACTCTCACCGACACGAACGACAC     |
| MgiTA2(Hind)_rev        | TCAAAGCTT <u>TCA</u> GTCGTCGAGGCGCAGCATC      |
| RaqTA1(Nde)_for         | TCACAT <u>ATG</u> ACCAGAACGGTATACCTTAACGGG    |
| RaqTA1(Hind)_rev        | TCAAAGCTT <u>TTA</u> CCGGCTCGTCGCTTCCAC       |
| RaqTA3(Nde)_for         | TCACAT <u>ATG</u> TGGATTAATGGTGTGGCGGC        |
| RaqTA3(Hind)_rev        | TCAAAGCTT <u>TTA</u> ACAGCTCTGGAGCAGGAAATCGC  |

**Table S4.** HPLC analysis conditions.

|                                                 |                                                                           |
|-------------------------------------------------|---------------------------------------------------------------------------|
| <b>Instrument:</b>                              | Agilent 1100, DAD detector                                                |
| <b>Column:</b>                                  | EC 150/3 Nucleodur C18 Gravity 3 $\mu$ m (Macherey-Nagel, Düren, Germany) |
| <b>Eluent A:</b>                                | 0.01% formic acid in water                                                |
| <b>Eluent B:</b>                                | acetonitrile                                                              |
| <b>Flow rate:</b>                               | 0.7 mL/min                                                                |
| <b>Column temperature:</b>                      | 30°C                                                                      |
| <b>Injection volume:</b>                        | 1.0 $\mu$ L                                                               |
| <b>Detection</b>                                | UV, 340 nm                                                                |
| <hr/>                                           |                                                                           |
| Method A: 0-2.0 min: 40% B; 2.0-7.0 min: 60% B  |                                                                           |
| Method B: 0-2.0 min: 40% B; 2.0-8.5 min: 60% B  |                                                                           |
| Method C: 0-2.0 min: 40% B; 2.0-10.5 min: 50% B |                                                                           |
| Method D: 0-3.0min: 35% B; 9.0-13.0min: 60% B   |                                                                           |
| <hr/>                                           |                                                                           |

**Table S5.** Retention times of compounds after derivatisation with Marfey's reagent.

| Compound           | Method  | $t_{ret}$ [min] |       |
|--------------------|---------|-----------------|-------|
|                    |         | (S)             | (R)   |
| Alanine            | A, B, C | 1.81            | 2.12  |
| 1-Phenylethylamine | A       | 6.47            | 5.90  |
| 1-Aminotetralin    | B       | 7.24            | 7.54  |
| 1-Aminoindane      | C       | 9.63            | 9.94  |
| Glutamic acid      | D       | 1.69            | 1.86  |
| Glycine            | D       | 2.05            |       |
| Alanine            | D       | 2.28            | 2.96  |
| Methionine         | D       | 3.61            | 5.72  |
| Phenylalanine      | D       | 6.65            | 8.25  |
| 1-Phenylethylamine | D       | 11.15           | 10.37 |

## Supplemental figures

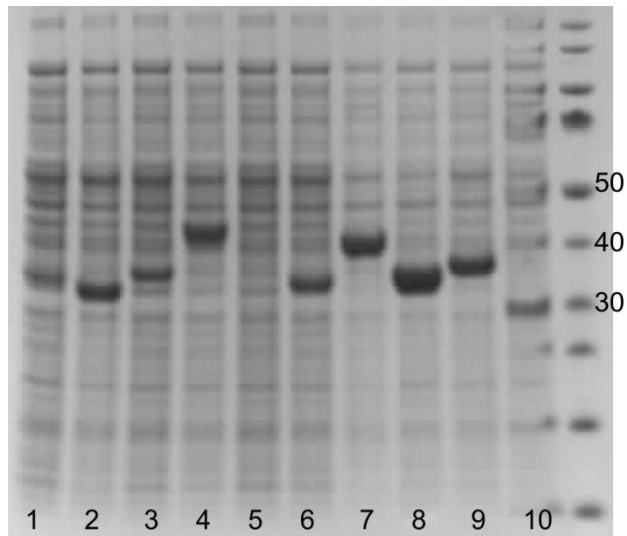

**Fig. S1.** SDS-PAGE gel of cell free lysate obtained by sonication and centrifugation of *E. coli* TOP10F' expressing various putative transaminases (pMS470 vector). 1: *AspTA1*, 2: *AspTA2*, 3: *CpuTA1*, 4: *CpuTA2*, 5: *CpuTA3*, 6: *MgiTA1*, 7: *MgiTA2*, 8: *RaqTA1*, 9: *RaqTA2*, 10: *RaqTA3*. St: Page Ruler Prestained Protein Ladder (Thermo Scientific). For molecular weights please refer to Table S1.

## Chromatograms

### Chromatograms to data presented in Table 2

#### Chrom. S1a. DL-Alanine (method A, B, C)

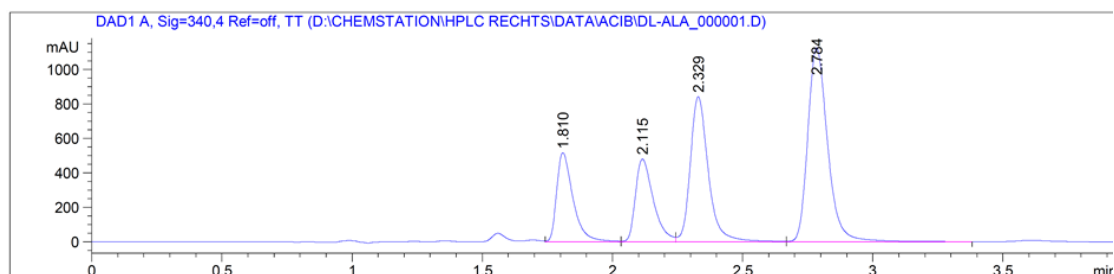

Signal 1: DAD1 A, Sig=340,4 Ref=off, TT

| Peak # | RetTime [min] | Type | Width [min] | Area [mAU*s] | Height [mAU] | Area %  |
|--------|---------------|------|-------------|--------------|--------------|---------|
| 1      | 1.810         | VV   | 0.0661      | 2256.96753   | 514.90405    | 15.4462 |
| 2      | 2.115         | VV   | 0.0727      | 2290.46802   | 479.62823    | 15.6755 |
| 3      | 2.329         | VV   | 0.0744      | 4068.29102   | 840.91064    | 27.8426 |
| 4      | 2.784         | VB   | 0.0813      | 5996.04492   | 1123.69043   | 41.0357 |

#### Chrom. S1b. D-Alanine (method A, B, C)

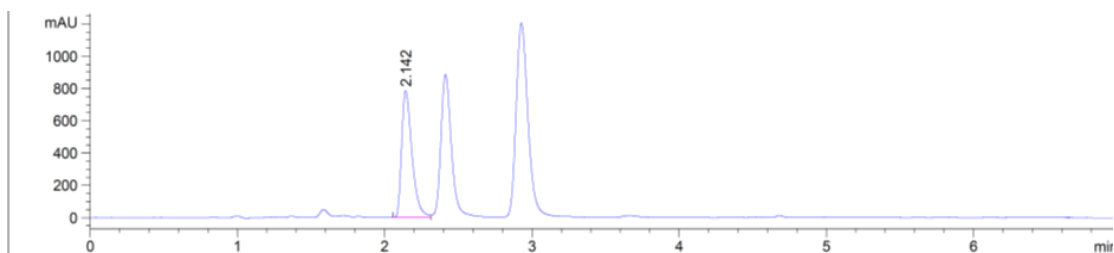

#### Chrom. S2a. rac-1-Phenylethylamine (method A)

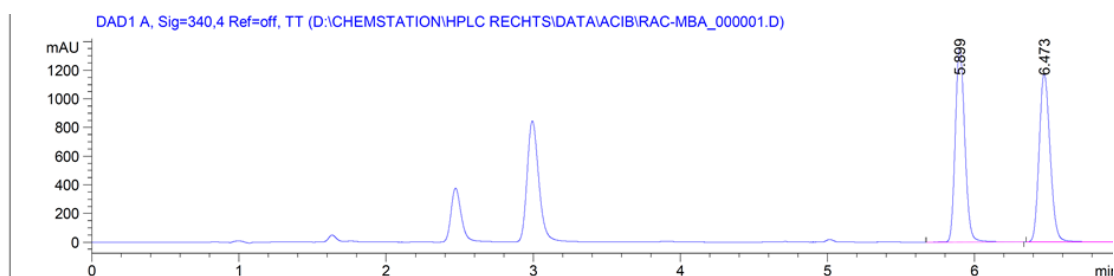

Signal 1: DAD1 A, Sig=340,4 Ref=off, TT

| Peak # | RetTime [min] | Type | Width [min] | Area [mAU*s] | Height [mAU] | Area %  |
|--------|---------------|------|-------------|--------------|--------------|---------|
| 1      | 5.899         | BB   | 0.0705      | 6094.79492   | 1353.74890   | 49.9462 |
| 2      | 6.473         | BBA  | 0.0817      | 6107.92969   | 1174.17004   | 50.0538 |

### Chrom. S2b. (R)-1-Phenylethylamine (method A)

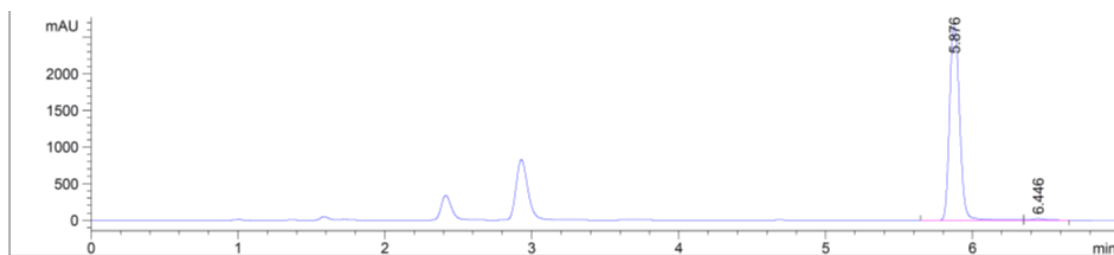

### Chrom. S3a. rac-1-Aminotetralin (method B)

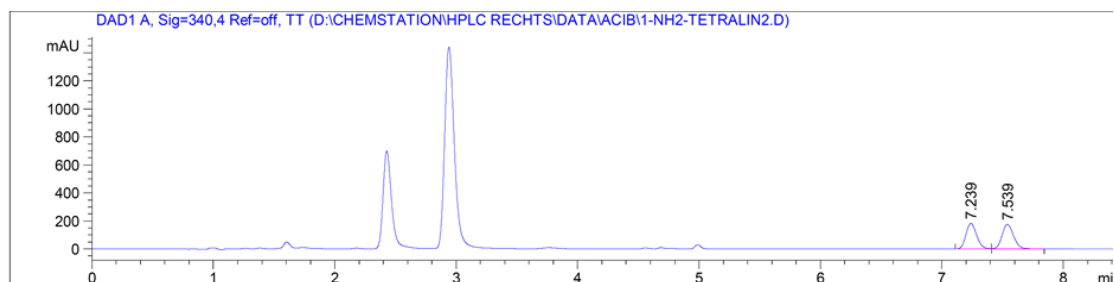

Signal 1: DAD1 A, Sig=340,4 Ref=off, TT

| Peak # | RetTime [min] | Type | Width [min] | Area [mAU*s] | Height [mAU] | Area %  |
|--------|---------------|------|-------------|--------------|--------------|---------|
| 1      | 7.239         | BV   | 0.0953      | 1115.38049   | 182.45490    | 49.1824 |
| 2      | 7.539         | VB   | 0.1026      | 1152.46472   | 175.62392    | 50.8176 |

### Chrom. S3b. (R)-1-Aminotetralin (method B)

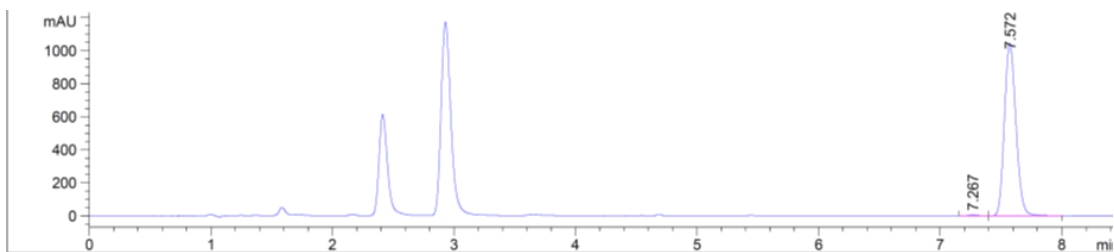

### Chrom. S4a. (S)-1-Aminoindane + (R)-1-aminoindane; (S)/(R) = 2:1 (method C)

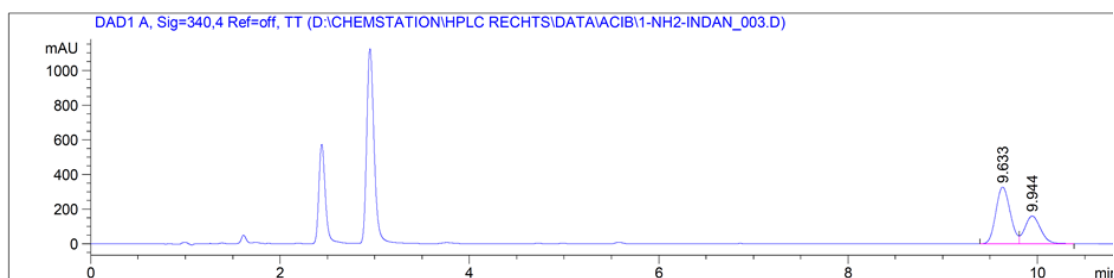

Signal 1: DAD1 A, Sig=340,4 Ref=off, TT

| Peak # | RetTime [min] | Type | Width [min] | Area [mAU*s] | Height [mAU] | Area %  |
|--------|---------------|------|-------------|--------------|--------------|---------|
| 1      | 9.633         | BV   | 0.1653      | 3428.74829   | 326.94998    | 65.0403 |
| 2      | 9.944         | VB   | 0.1777      | 1842.98218   | 159.63591    | 34.9597 |

### Chrom. S4b. (R)-1-Aminoindane (method C)

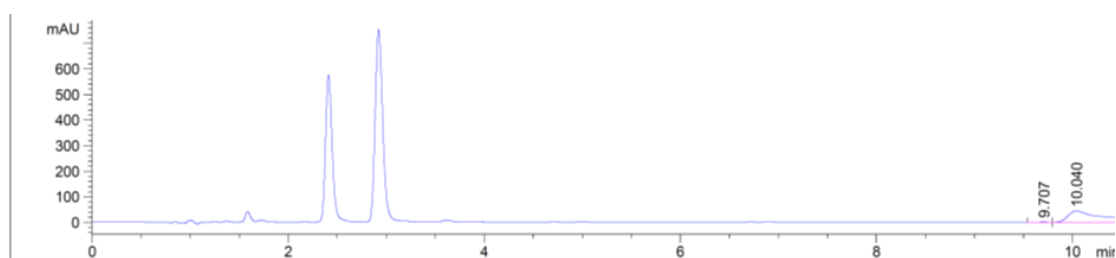

### Chrom. S5. Reaction of *rac*-1-phenylethylamine with pyruvate in the presence of *MgiTA1* after 24h (method A)

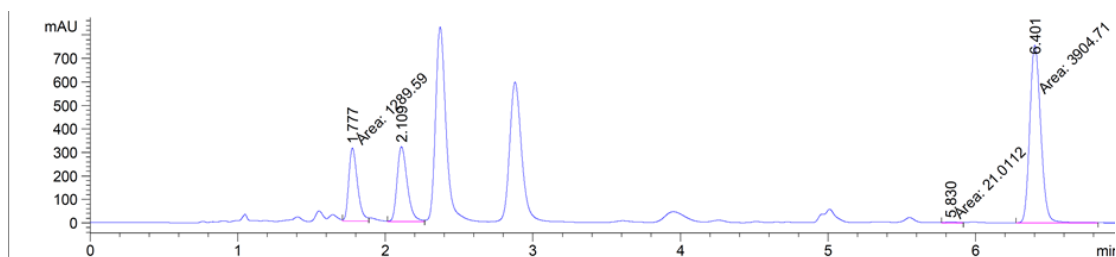

Signal 1: DAD1 A, Sig=340,4 Ref=off, TT

| Peak # | RetTime [min] | Type | Width [min] | Area [mAU*s] | Height [mAU] | Area %  |
|--------|---------------|------|-------------|--------------|--------------|---------|
| 1      | 1.777         | MF   | 0.0689      | 1289.59448   | 311.81287    | 19.1483 |
| 2      | 2.109         | VV   | 0.0737      | 1519.44324   | 318.30035    | 22.5612 |
| 3      | 5.830         | FM   | 0.0832      | 21.01121     | 4.20805      | 0.3120  |
| 4      | 6.401         | FM   | 0.0861      | 3904.71362   | 756.02844    | 57.9785 |

### Chrom. S6. Reaction of *rac*-1-aminotetralin with pyruvate in the presence of *MgiTA1* after 24h (method B)

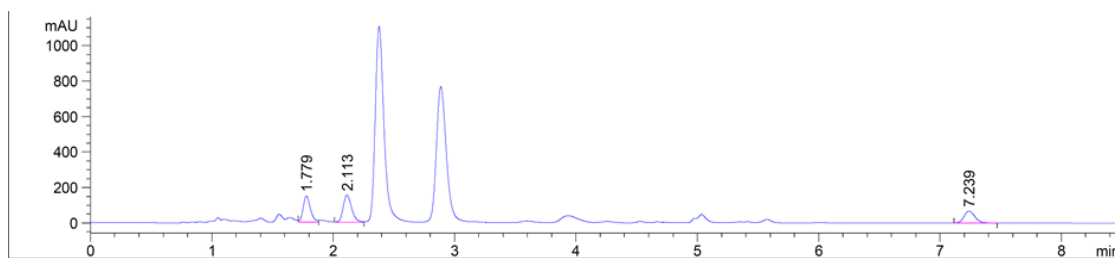

Signal 1: DAD1 A, Sig=340,4 Ref=off, TT

| Peak # | RetTime [min] | Type | Width [min] | Area [mAU*s] | Height [mAU] | Area %  |
|--------|---------------|------|-------------|--------------|--------------|---------|
| 1      | 1.779         | VV   | 0.0634      | 606.34552    | 146.26454    | 34.8297 |
| 2      | 2.113         | VV   | 0.0736      | 721.30048    | 151.44264    | 41.4330 |
| 3      | 7.239         | BB   | 0.0953      | 413.23959    | 67.58504     | 23.7373 |



**Chrom. S7.** Reaction of *rac*-1-aminoindane with pyruvate in the presence of *MgiTA1* after 24h (method C)

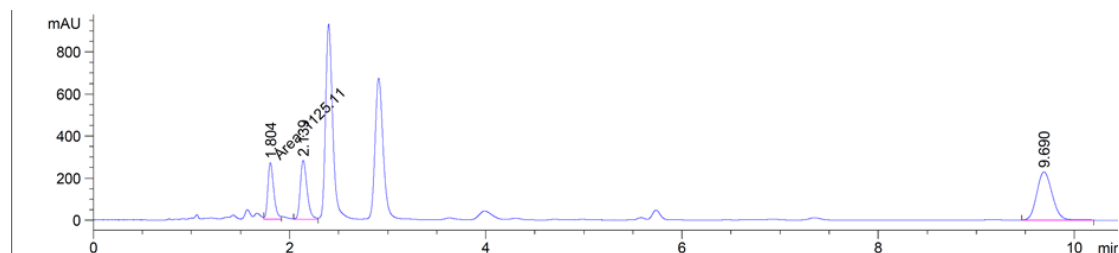

Signal 1: DAD1 A, Sig=340,4 Ref=off, TT

| Peak # | RetTime [min] | Type | Width [min] | Area [mAU*s] | Height [mAU] | Area %  |
|--------|---------------|------|-------------|--------------|--------------|---------|
| 1      | 1.804         | MF   | 0.0700      | 1125.11365   | 267.84354    | 22.8153 |
| 2      | 2.139         | VV   | 0.0736      | 1328.67896   | 278.60529    | 26.9432 |
| 3      | 9.690         | BB   | 0.1692      | 2477.61401   | 229.12068    | 50.2415 |

**Chromatograms to data presented in Table 3**

**Chrom. S8.** Analysis of an amino acid mixture consisting of glycine, DL-alanine, glutamic acid (D/L = 1.77), methionine (D/L = 1.56) and phenylalanine (D/L = 1.95) (method D)

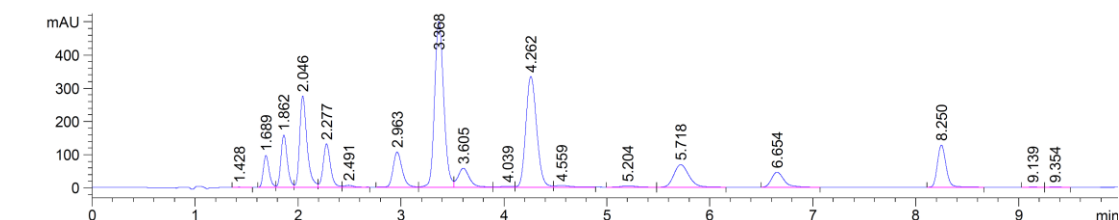

Signal 1: DAD1 A, Sig=340,4 Ref=off, TT

| Peak # | RetTime [min] | Type | Width [min] | Area [mAU*s] | Height [mAU] | Area %  |       |
|--------|---------------|------|-------------|--------------|--------------|---------|-------|
| 1      | 1.428         | BB   | 0.0612      | 5.26829      | 1.30279      | 0.0447  |       |
| 2      | 1.689         | BV   | 0.0605      | 382.82028    | 96.13377     | 3.2515  | L-Glu |
| 3      | 1.862         | VV   | 0.0668      | 685.78912    | 157.63814    | 5.8248  | D-Glu |
| 4      | 2.046         | VV   | 0.0741      | 1370.44299   | 275.18820    | 11.6399 | Gly   |
| 5      | 2.277         | VV   | 0.0765      | 657.11340    | 130.98158    | 5.5812  | L-Ala |
| 6      | 2.491         | VB   | 0.1022      | 47.20288     | 6.54390      | 0.4009  |       |
| 7      | 2.963         | BV   | 0.0947      | 663.15881    | 106.38354    | 5.6326  | D-Ala |
| 8      | 3.368         | VV   | 0.0963      | 3089.62793   | 498.82541    | 26.2418 |       |
| 9      | 3.605         | VV   | 0.1175      | 453.25974    | 57.77902     | 3.8498  | L-Met |
| 10     | 4.039         | VV   | 0.1335      | 29.15875     | 2.99647      | 0.2477  |       |
| 11     | 4.262         | VV   | 0.1156      | 2451.39453   | 334.01700    | 20.8210 |       |
| 12     | 4.559         | VB   | 0.1615      | 65.88130     | 5.75575      | 0.5596  |       |
| 13     | 5.204         | BV   | 0.1677      | 51.97421     | 4.60585      | 0.4414  |       |
| 14     | 5.718         | VB   | 0.1570      | 695.67987    | 68.17644     | 5.9088  | D-Met |
| 15     | 6.654         | BB   | 0.1302      | 379.61288    | 45.09370     | 3.2243  | L-Phe |
| 16     | 8.250         | BB   | 0.0899      | 736.12823    | 126.57189    | 6.2523  | D-Phe |
| 17     | 9.139         | BV   | 0.0902      | 2.87513      | 5.22499e-1   | 0.0244  |       |
| 18     | 9.354         | VB   | 0.0868      | 6.28778      | 1.13243      | 0.0534  |       |

**Chrom. S9.** Reaction of *rac*-1-phenylethylamine with  $\alpha$ -keto glutarate in the presence of *Cpu*TA1 after 24h (method D)

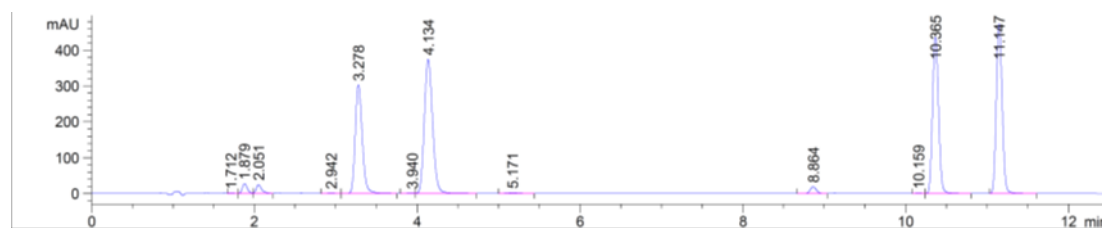

Signal 1: DAD1 A, Sig=340,4 Ref=off, TT

| Peak # | RetTime [min] | Type | Width [min] | Area [mAU*s] | Height [mAU] | Area %  |
|--------|---------------|------|-------------|--------------|--------------|---------|
| 1      | 1.712         | VV   | 0.0629      | 7.19441      | 1.68215      | 0.0757  |
| 2      | 1.879         | VV   | 0.0660      | 119.31408    | 27.83022     | 1.2561  |
| 3      | 2.051         | VV   | 0.0744      | 119.44154    | 24.27901     | 1.2575  |
| 11     | 10.365        | VB   | 0.0823      | 2249.63672   | 435.61060    | 23.6840 |
| 12     | 11.147        | BB   | 0.0799      | 2391.17651   | 473.24359    | 25.1742 |

D-Glu  
Gly

**Chrom. S10.** Reaction of *rac*-1-phenylethylamine with glyoxylic acid in the presence of *Cpu*TA1 after 24h (method D)

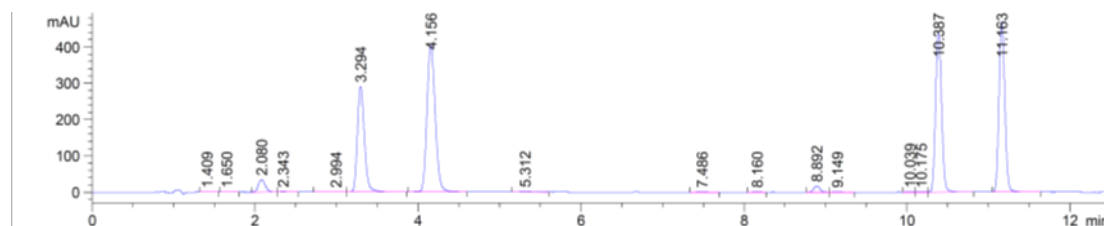

Signal 1: DAD1 A, Sig=340,4 Ref=off, TT

| Peak # | RetTime [min] | Type | Width [min] | Area [mAU*s] | Height [mAU] | Area %  |
|--------|---------------|------|-------------|--------------|--------------|---------|
| 1      | 1.409         | BB   | 0.0695      | 4.38706      | 9.21968e-1   | 0.0457  |
| 2      | 1.650         | BB   | 0.0737      | 5.73751      | 1.10215      | 0.0598  |
| 3      | 2.080         | BV   | 0.0958      | 202.20061    | 33.81403     | 2.1066  |
| 15     | 10.387        | VB   | 0.0809      | 2268.66943   | 442.19571    | 23.6361 |
| 16     | 11.163        | BB   | 0.0797      | 2363.67725   | 469.97104    | 24.6260 |

**Chrom. S11.** Reaction of *rac*-1-phenylethylamine with  $\alpha$ -keto- $\gamma$ -(methyl-thio)-butyrate in the presence of *CpuTA1* after 24h (method D)

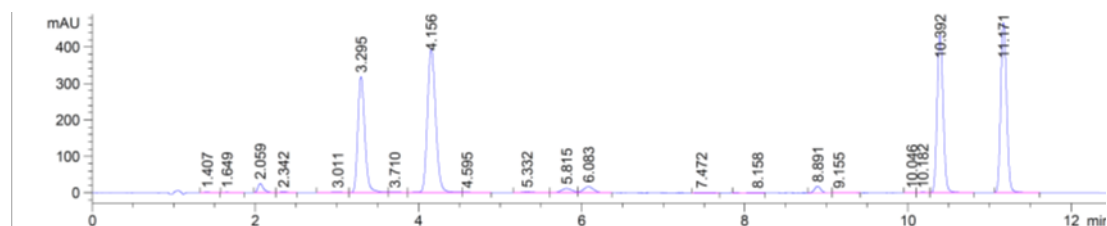

Signal 1: DAD1 A, Sig=340,4 Ref=off, TT

| Peak # | RetTime [min] | Type | Width [min] | Area [mAU*s] | Height [mAU] | Area %  |
|--------|---------------|------|-------------|--------------|--------------|---------|
| 11     | 5.815         | VV   | 0.1472      | 105.22019    | 11.24384     | 1.0698  |
| 19     | 10.392        | VB   | 0.0811      | 2229.21704   | 433.05884    | 22.6650 |
| 20     | 11.171        | BB   | 0.0797      | 2348.27148   | 466.37875    | 23.8754 |

**Chrom. S12.** Reaction of *rac*-1-phenylethylamine with phenylpyruvate in the presence of *CpuTA1* after 24h (method D)

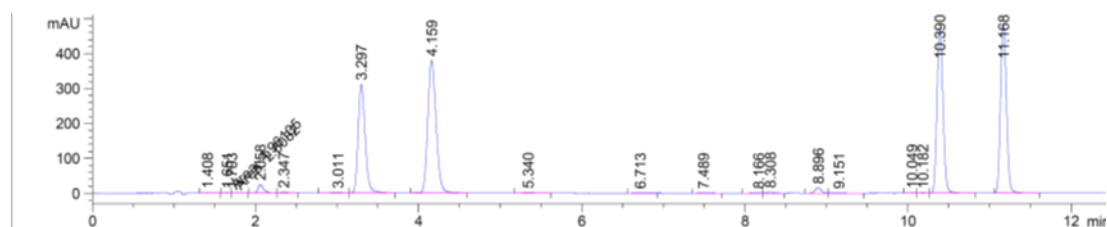

Signal 1: DAD1 A, Sig=340,4 Ref=off, TT

| Peak # | RetTime [min] | Type | Width [min] | Area [mAU*s] | Height [mAU] | Area %  |
|--------|---------------|------|-------------|--------------|--------------|---------|
| 13     | 8.308         | VV   | 0.0927      | 20.39646     | 3.36693      | 0.2082  |
| 18     | 10.390        | VB   | 0.0811      | 2433.62720   | 472.60370    | 24.8421 |
| 19     | 11.168        | BB   | 0.0788      | 2453.55640   | 487.07599    | 25.0456 |
